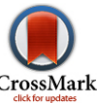

## Correction

# Correction: Natriuretic Peptide-Guided Therapy in Chronic Heart Failure: A Meta-Analysis of 2,686 Patients in 12 Randomized Trials

**The PLOS ONE Staff**

There is an error in the last sentence of the section titled “Methodology/Principal Findings” in the Abstract. The reported value of the confidence interval for all-cause hospitalization is incorrect. The correct values for all-cause hospitalization, as reported correctly in the text and figures, are (OR:0.726; CI:0.509 to 1.035;  $p = 0.077$ ).

**Reference**

1. Savarese G, Trimarco B, Dellegrottaglie S, Prastaro M, Gambardella F, et al. (2013) Natriuretic Peptide-Guided Therapy in Chronic Heart Failure: A Meta-Analysis of 2,686 Patients in 12 Randomized Trials. PLoS ONE 8(3): e58287. doi:10.1371/journal.pone.0058287

**Citation:** The PLOS ONE Staff (2014) Correction: Natriuretic Peptide-Guided Therapy in Chronic Heart Failure: A Meta-Analysis of 2,686 Patients in 12 Randomized Trials. PLoS ONE 9(4): e96706. doi:10.1371/journal.pone.0096706

**Published:** April 25, 2014

**Copyright:** © 2014 The PLOS ONE Staff. This is an open-access article distributed under the terms of the Creative Commons Attribution License, which permits unrestricted use, distribution, and reproduction in any medium, provided the original author and source are credited.
